# Supplementary material for: Expanding spectrum of “spitzoid” lesions: a small series of 4 cases with MAP2K1 mutations
Source: PubMed Central journal article supplement (PMC8298358; doi:10.1007/s00428-020-02940-3), 2020-10-11
Supplement: 428_2020_2940_MOESM1_ESM.pdf [file 428_2020_2940_MOESM1_ESM.pdf]

## **Title**

Expanding spectrum of 'spitzoid' lesions: a small series of 4 cases with *MAP2K1* mutations.

## **Journal**

Virchows Archiv

## **Authors**

K.G.P. Kerckhoffs<sup>1</sup>, T. Aallali<sup>2</sup>, C.A. Ambarus<sup>3</sup>, V. Sigurdsson<sup>4</sup>, A.M.L. Jansen<sup>5</sup>, W.A.M. Blokx<sup>5</sup>

## **Affiliations**

<sup>1</sup> Department of Pathology, Maastricht University Medical Center+, Maastricht, The Netherlands

<sup>2</sup> Pathology Expert Center, Hoorn/Zaandam, The Netherlands

<sup>3</sup> Department of Pathology, Sint Antonius Hospital, Nieuwegein, The Netherlands

<sup>4</sup> Department of Dermatology, University Medical Center Utrecht, Utrecht, The Netherlands

<sup>5</sup> Department of Pathology, Division of Laboratories, Pharmacy and Biomedical Genetics, University Medical Center Utrecht, Utrecht, The Netherlands

## **Corresponding author**

K.G.P. Kerckhoffs

E-mail: [kelly.kerckhoffs@mumc.nl](mailto:kelly.kerckhoffs@mumc.nl)

## Online Resource 1: Details immunohistochemical stains

Most stains were performed or repeated at the University Medical Center Utrecht (UMCU). For Case 1, 2 and 3 few stains were performed at the center where the case was originally seen.

### Immunohistochemical stains UMCU

| Stain             | Clone    | Firm           | Dilution |
|-------------------|----------|----------------|----------|
| <i>ALK</i>        | 5A4      | Novocastra     | 1:20     |
| <i>BAP1</i>       | C4       | Santa Cruz     | 1:200    |
| <i>BRAF V600E</i> | VE1      | Ventana        | RTU      |
| <i>HMB-45</i>     | HMB-45   | DAKO           | 1:200    |
| <i>Ki-67</i>      | Ki-67    | Ventana        | RTU      |
| <i>MelanA</i>     | A103     | DAKO           | 1:40     |
| <i>NTRK</i>       | EPR17341 | Abcam          | 1:500    |
| <i>p16</i>        | MX007    | Immunologic    | 1:800    |
| <i>p21</i>        | DCS-60.2 | Cellmarque     | RTU      |
| <i>ROS1</i>       | D4D6     | Cell Signaling | 1:50     |
| <i>S100</i>       | na       | DAKO           | 1:8000   |

### Additional immunohistochemical stains Symbiant Pathology Expert Center (Case 1)

| Stain       | Clone   | Firm   | Dilution |
|-------------|---------|--------|----------|
| <i>BAP1</i> | BSB-109 | BIO-SB | 1:50     |

### Additional immunohistochemical stains Meander Medical Center (Case 2)

| Stain         | Clone     | Firm       | Dilution |
|---------------|-----------|------------|----------|
| <i>ALK</i>    | NCL-L-ALK | Novocastra | 1:25     |
| <i>HMB-45</i> | HMB-45    | DAKO       | RTU      |
| <i>MelanA</i> | A103      | DAKO       | RTU      |
| <i>Ki-67</i>  | MIB-1     | DAKO       | RTU      |

### Additional immunohistochemical stains Sint Antonius Hospital (Case 3)

| Stain         | Clone  | Firm    | Dilution |
|---------------|--------|---------|----------|
| <i>HMB-45</i> | HMB-45 | Ventana | RTU      |
| <i>MelanA</i> | A103   | Ventana | RTU      |
| <i>p16</i>    | E6H4   | Ventana | RTU      |

na: not applicable; RTU: ready to use
