# Supplementary material for: Expanding spectrum of “spitzoid” lesions: a small series of 4 cases with MAP2K1 mutations
Source: PubMed Central journal article supplement (PMC8298358; doi:10.1007/s00428-020-02940-3), 2020-10-11
Supplement: 428_2020_2940_MOESM3_ESM.pdf [file 428_2020_2940_MOESM3_ESM.pdf]

**Title**

Expanding spectrum of 'spitzoid' lesions: a small series of 4 cases with *MAP2K1* mutations.

**Journal**

Virchows Archiv

**Authors**

K.G.P. Kerckhoffs<sup>1</sup>, T. Aallali<sup>2</sup>, C.A. Ambarus<sup>3</sup>, V. Sigurdsson<sup>4</sup>, A.M.L. Jansen<sup>5</sup>, W.A.M. Blokx<sup>5</sup>

**Affiliations**

<sup>1</sup> Department of Pathology, Maastricht University Medical Center+, Maastricht, The Netherlands

<sup>2</sup> Pathology Expert Center, Hoorn/Zaandam, The Netherlands

<sup>3</sup> Department of Pathology, Sint Antonius Hospital, Nieuwegein, The Netherlands

<sup>4</sup> Department of Dermatology, University Medical Center Utrecht, Utrecht, The Netherlands

<sup>5</sup> Department of Pathology, Division of Laboratories, Pharmacy and Biomedical Genetics, University Medical Center Utrecht, Utrecht, The Netherlands

**Corresponding author**

K.G.P. Kerckhoffs

E-mail: [kelly.kerckhoffs@mumc.nl](mailto:kelly.kerckhoffs@mumc.nl)

### Online Resource 3

#### Microscopical and molecular findings case 1

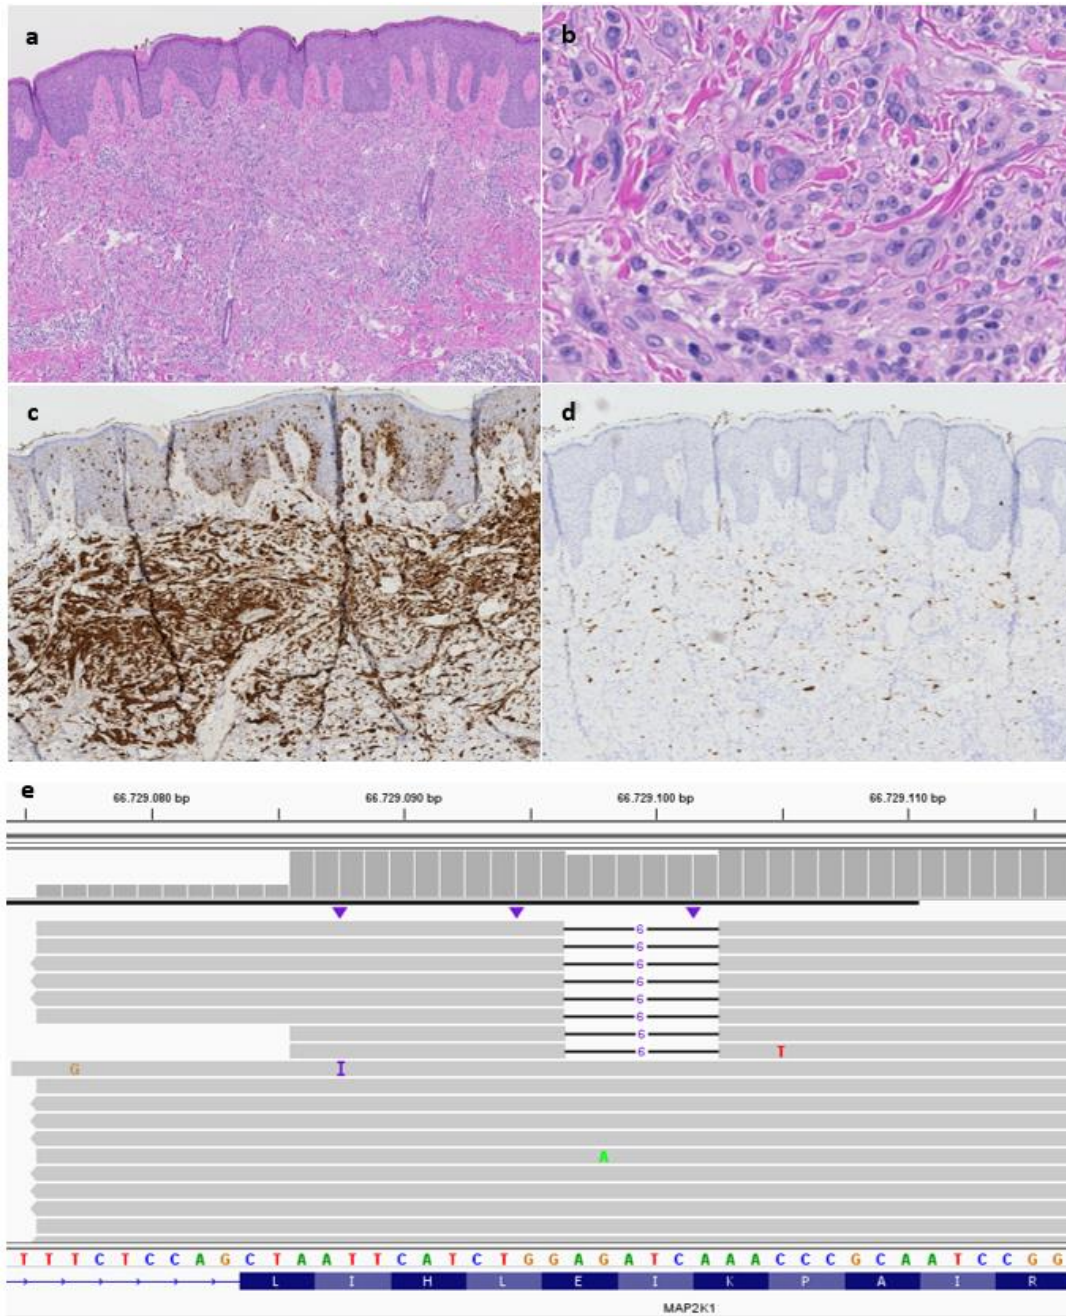

**a** H&E, x5: symmetrical, slightly wedge-shaped dermal melanocytic proliferation with overlying epidermal hyperplasia.

**b** H&E, x40: epithelioid to spindle-shaped melanocytes with pale, eosinophilic cytoplasm and in deeper sections more atypia with pleomorphism, prominent nucleoli and sometimes presence of nuclear inclusions.

**c** S100 stain, x5: positive staining.

**d** p16 stain, x5: few staining cells, but a checkerboard pattern could still be discerned.

**e** Integrative Genomics Viewer (IGV) visualization of the sequence data containing *MAP2K1* in-frame deletion c.306\_311del (p.Ile103\_Lys104del) in 13% of the reads (RefSeq NM\_002755.3). The black lines indicate the location of the deletion.

**Microscopical and molecular findings case 4**

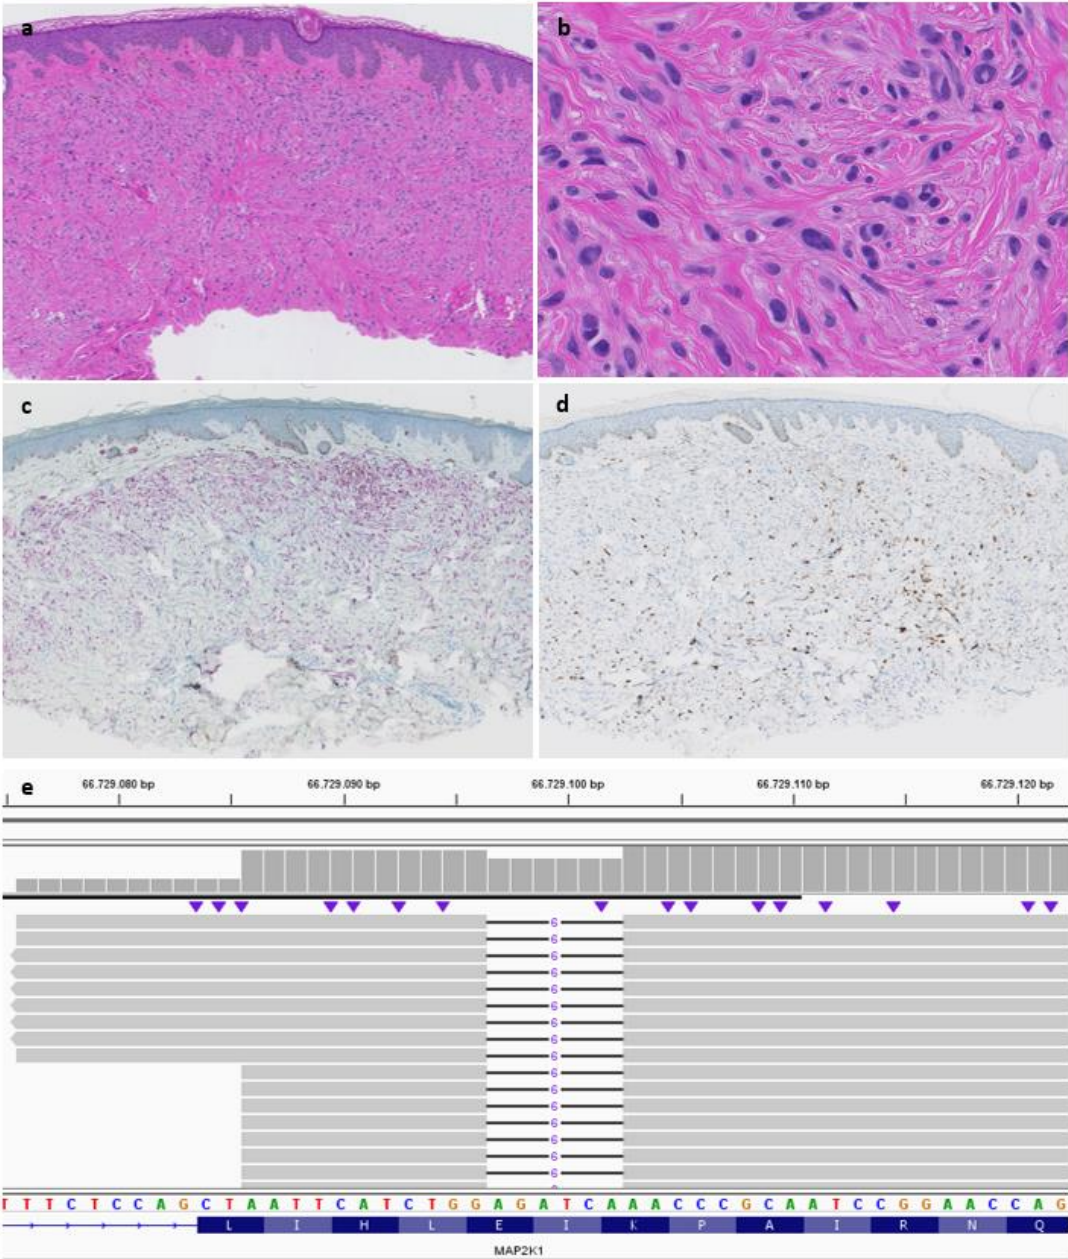

**a** H&E, x5: symmetrical, dermal, slightly wedge-shaped melanocytic proliferation showing maturation towards deeper parts.  
**b** H&E, x40: spindle-shaped melanocytes with pale, eosinophilic cytoplasm.  
**c** Melan A stain, x5: positive staining.  
**d** p16 stain, x5: focal positivity.  
**e** Integrative Genomics Viewer (IGV) visualization of the sequence data containing *MAP2K1* c.306\_311del (p.Ile103\_Lys104del) in 28% of the reads (RefSeq NM\_002755.3). The black lines indicate the location of the deletion.
