# Supplementary material for: Expanding spectrum of “spitzoid” lesions: a small series of 4 cases with MAP2K1 mutations
Source: PubMed Central journal article supplement (PMC8298358; doi:10.1007/s00428-020-02940-3), 2020-10-11

**Title**

Expanding spectrum of 'spitzoid' lesions: a small series of 4 cases with *MAP2K1* mutations.

**Journal**

Virchows Archiv

**Authors**

K.G.P. Kerckhoffs<sup>1</sup>, T. Aallali<sup>2</sup>, C.A. Ambarus<sup>3</sup>, V. Sigurdsson<sup>4</sup>, A.M.L. Jansen<sup>5</sup>, W.A.M. Blokx<sup>5</sup>

**Affiliations**

<sup>1</sup> Department of Pathology, Maastricht University Medical Center+, Maastricht, The Netherlands

<sup>2</sup> Pathology Expert Center, Hoorn/Zaandam, The Netherlands

<sup>3</sup> Department of Pathology, Sint Antonius Hospital, Nieuwegein, The Netherlands

<sup>4</sup> Department of Dermatology, University Medical Center Utrecht, Utrecht, The Netherlands

<sup>5</sup> Department of Pathology, Division of Laboratories, Pharmacy and Biomedical Genetics, University Medical Center Utrecht, Utrecht, The Netherlands

**Corresponding author**

K.G.P. Kerckhoffs

E-mail: [kelly.kerckhoffs@mumc.nl](mailto:kelly.kerckhoffs@mumc.nl)

**Online Resource 4: Clinical pictures**

**Case 3**

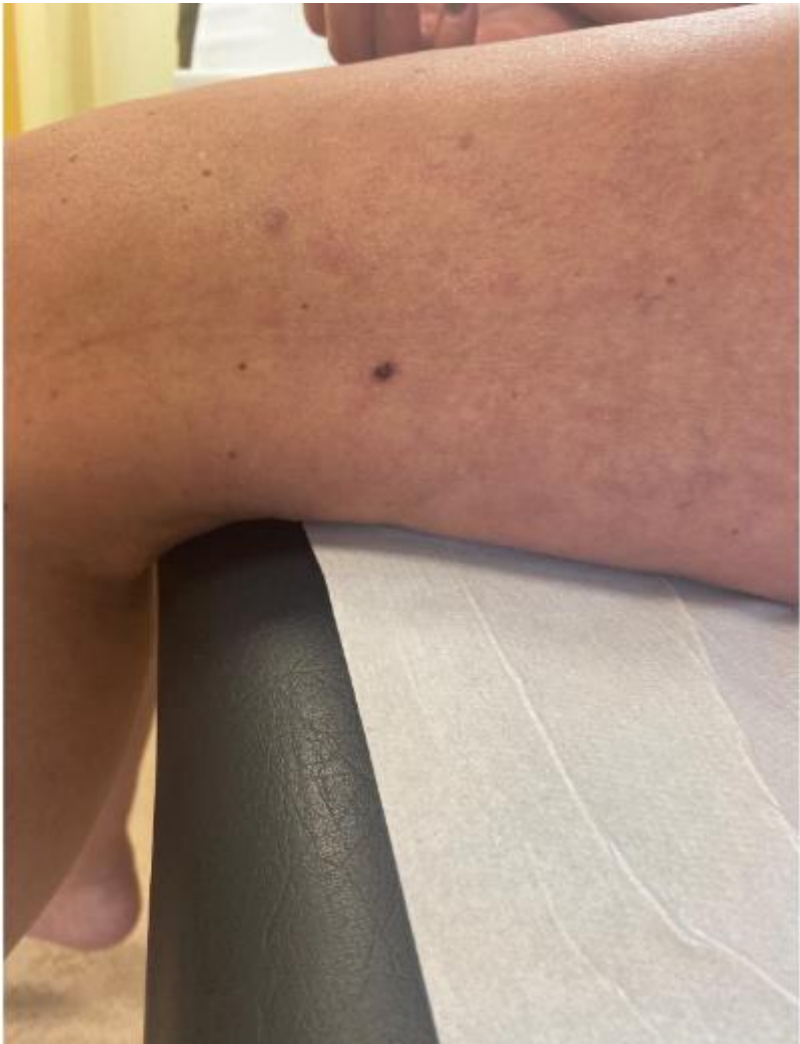

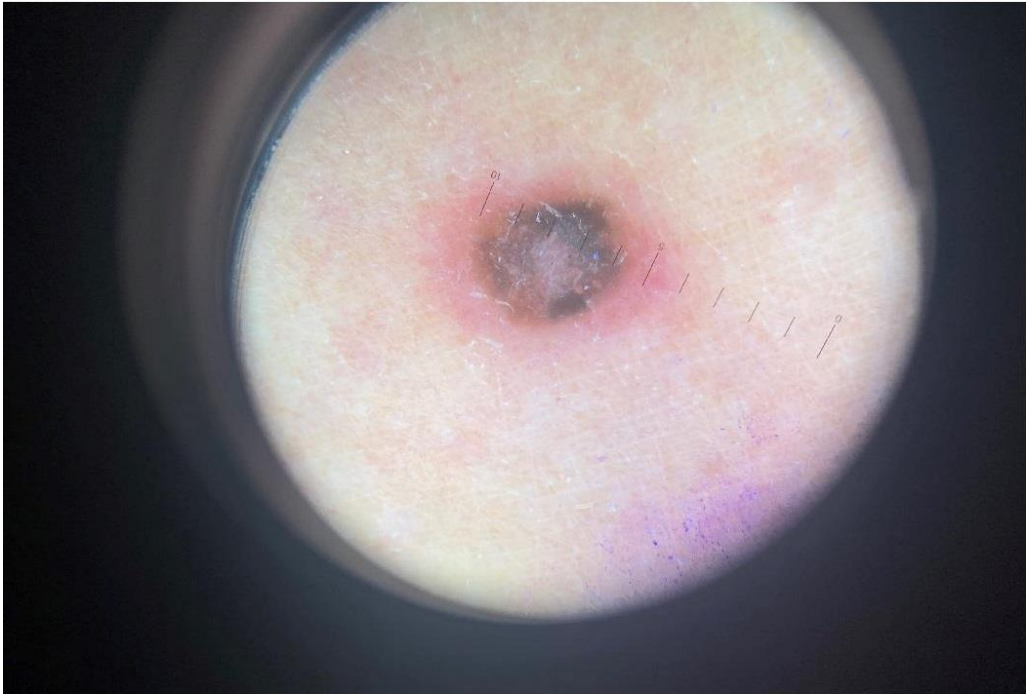

Case 4  
In 2015

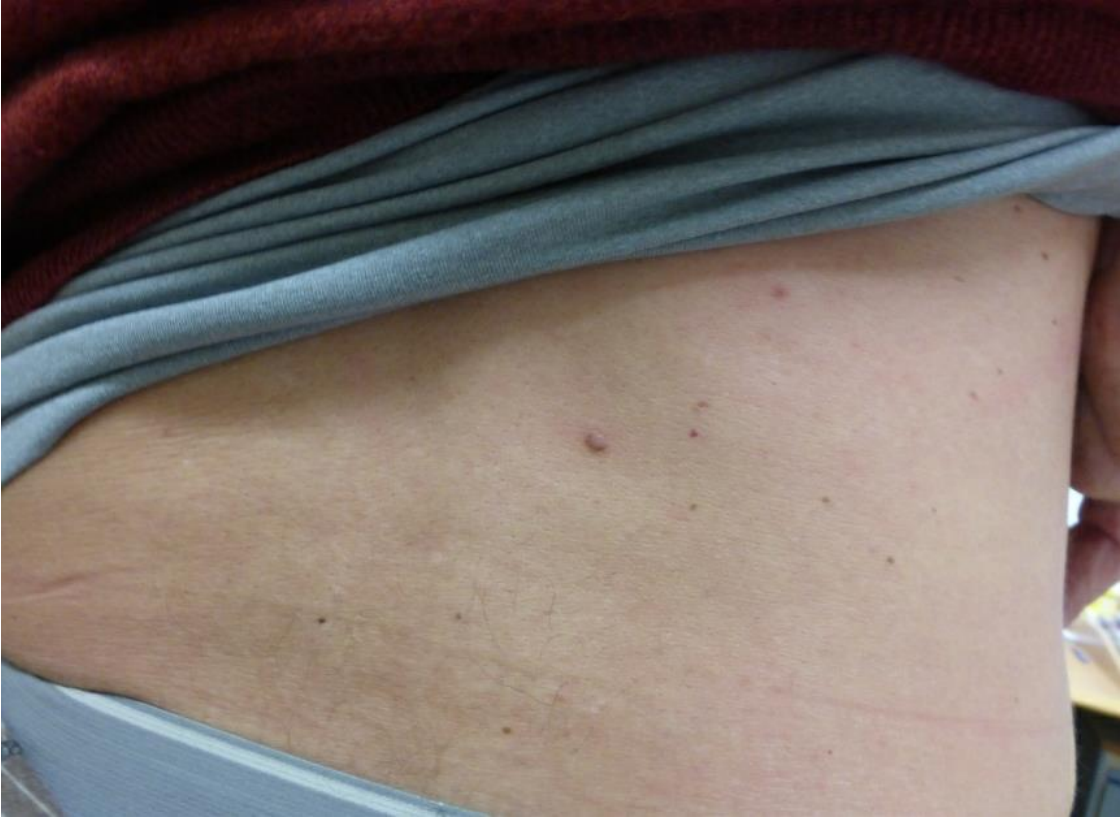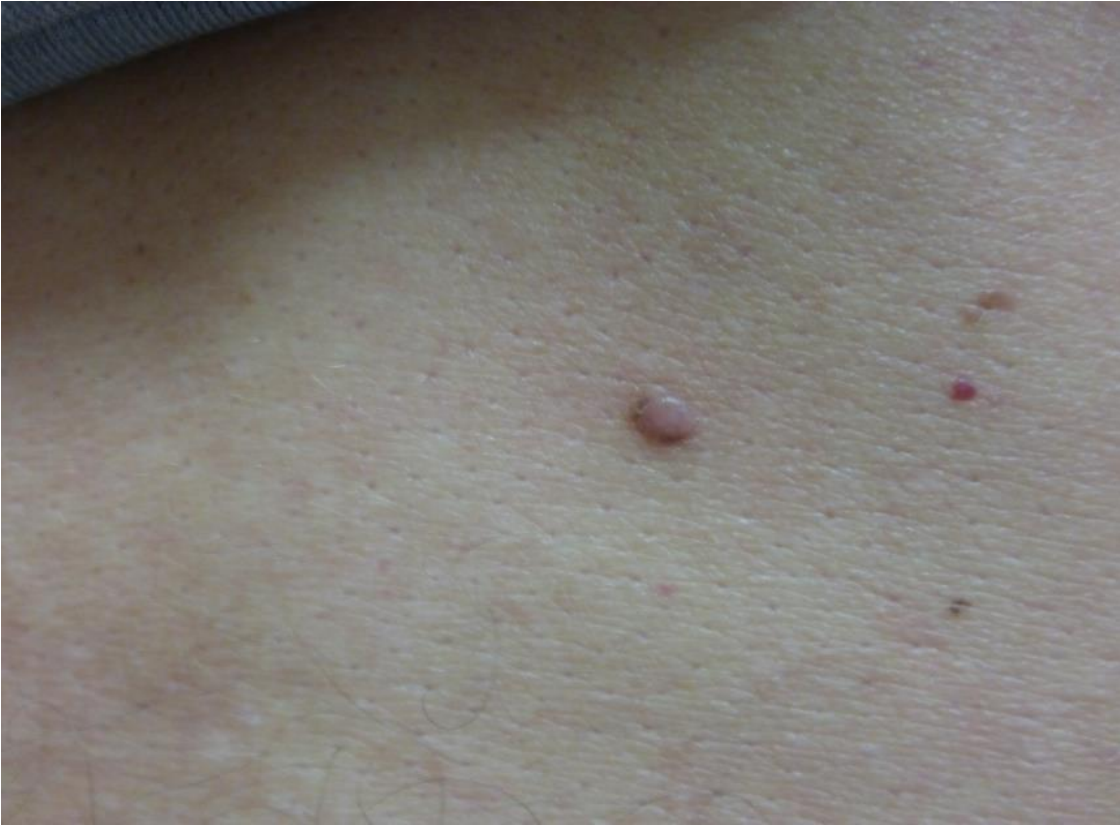

In 2019

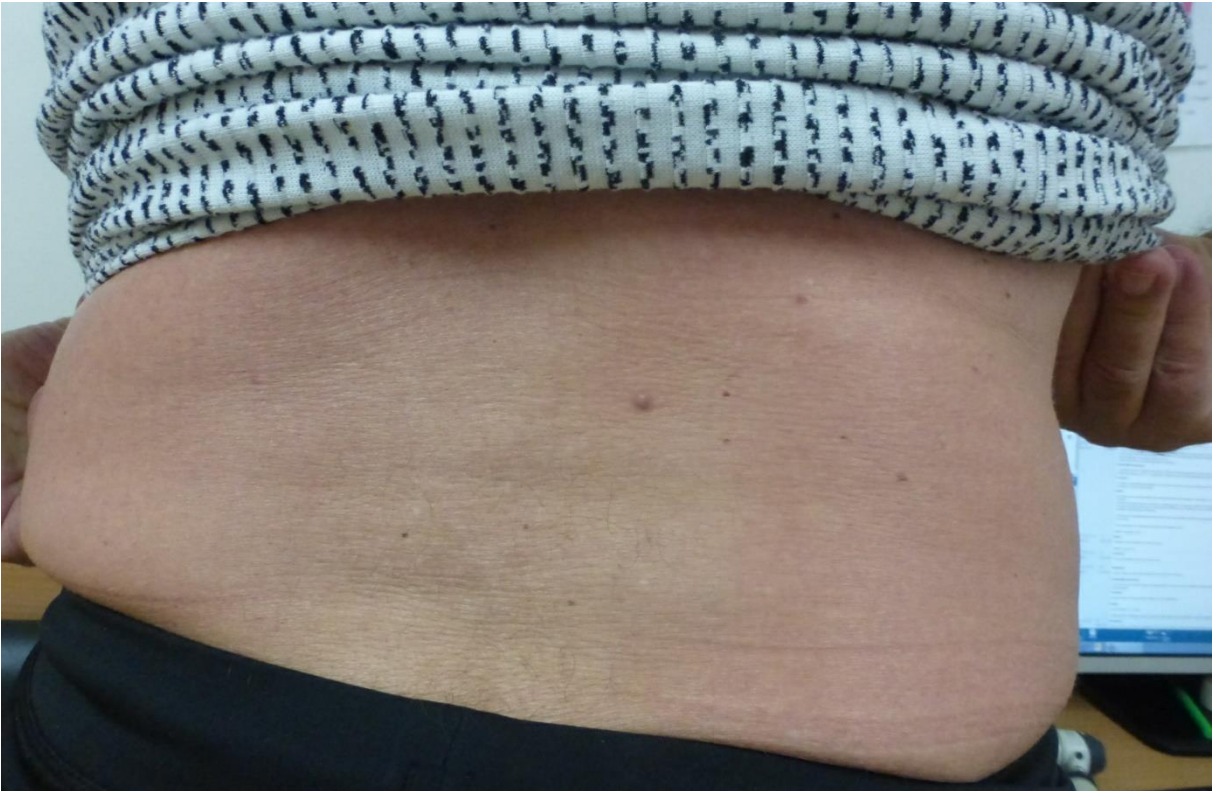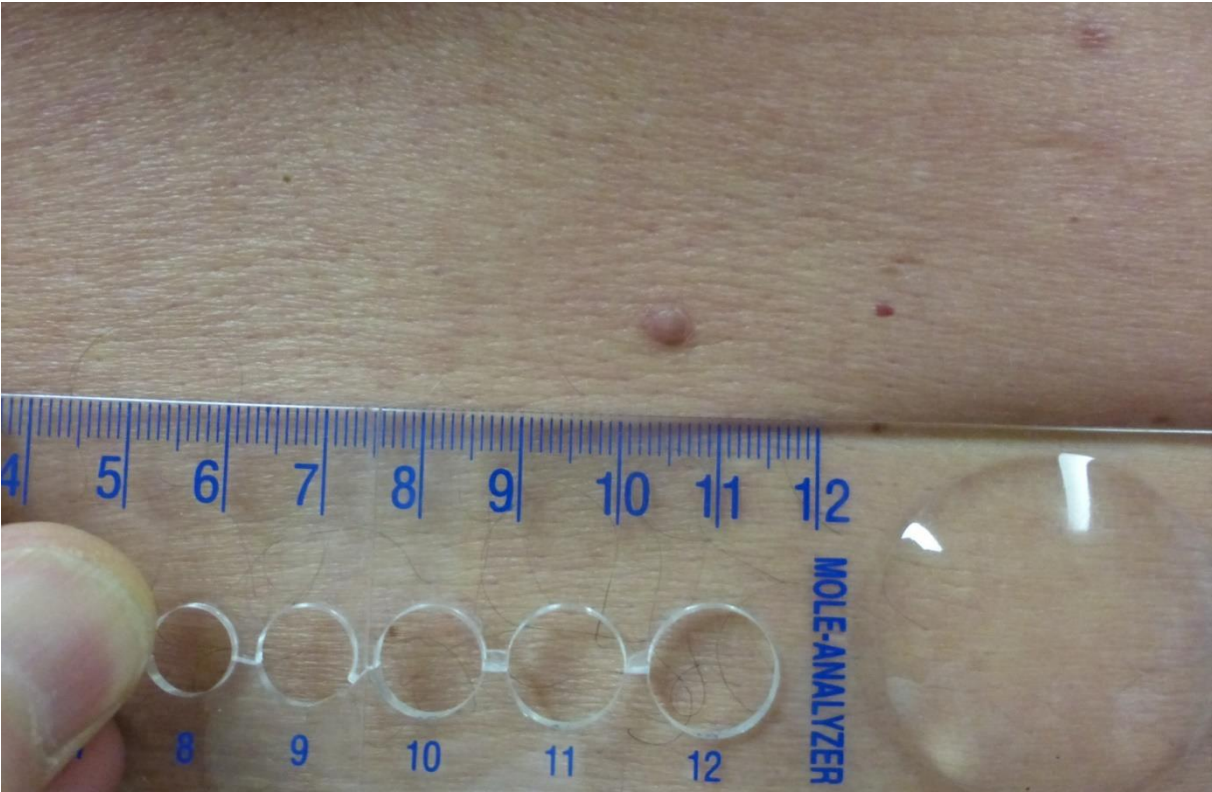

Supplement: 428_2020_2940_MOESM4_ESM.pdf [file 428_2020_2940_MOESM4_ESM.pdf]
